# Supplementary material
Source: MDPI journal article supplement (https://www.mdpi.com/2073-4441/15/9/1758)
Supplement: s1 [file s1]

## **Supporting Materials**

# **Enhanced removal of doxycycline by simultaneous potassium ferrate(VI) and montmorillonite: Reaction mechanism and synergistic effect**

Hangli Zhang<sup>1</sup>, Shujuan Wang<sup>2</sup>, Ji Shu<sup>3</sup>, Hongyu Wang<sup>3,\*</sup>

<sup>1</sup> College of Civil Engineering and Architecture, Zhejiang Tongji Vocational College of Science and Technology, Hangzhou 311231, China

<sup>2</sup> College of Civil Engineering and Architecture, Zhejiang University of Technology, Hangzhou 310014, China

<sup>3</sup> College of Environment, Zhejiang University of Technology, Hangzhou 310014, China

\* hywang@zjut.edu.cn

### Text S1. The Fe(VI) determination by ABTS method

At predetermined time intervals, 2.0 mL of the sample was collected and mixed with 4.0 mL of ABTS solutions at excess concentration of 450  $\mu\text{M}$ , prepared in 0.2 M phosphate/0.6 M acetate buffers at pH 4.2, to measure the absorbance at 415 nm for calculation of Fe(VI) residual concentration by followed equation:

$$[\text{Fe(VI)}] = \frac{\Delta A_l^{415} V_{\text{final}}}{34000 V_{\text{sample}}} \quad (\text{Equation S1})$$

Where  $\Delta A_l^{415}$  is the absorbance at 415nm after correcting for blank in cell of path length  $l$ .  $l$  is the path length of optical cell.  $V_{\text{final}}$  is the final volume after addition of all reagents and buffer (6 mL), and  $V_{\text{sample}}$  is the volume of original sample (2 mL).

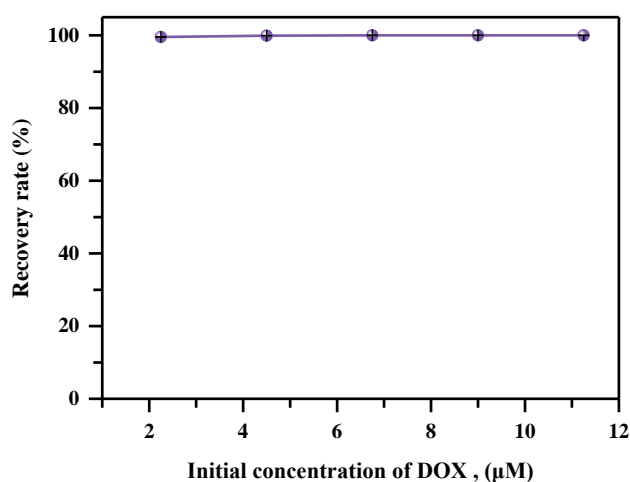

**Figure S1. The recovery rate after filtering by 0.22  $\mu\text{m}$  membrane**

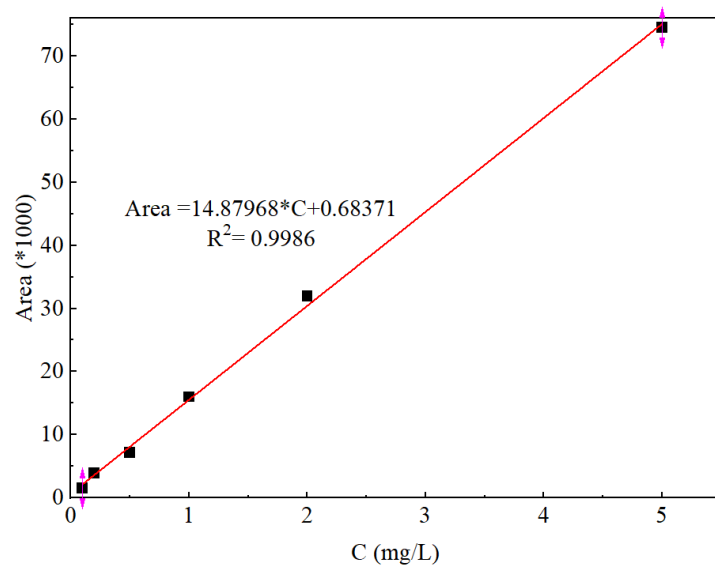

**Figure S2. The standard curve of DOX**

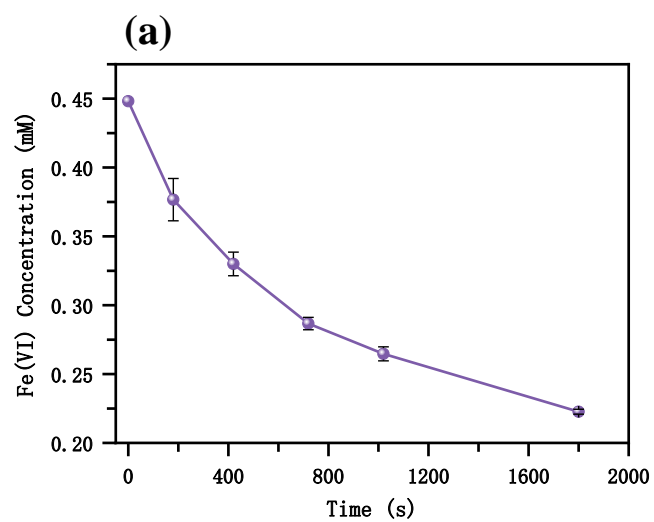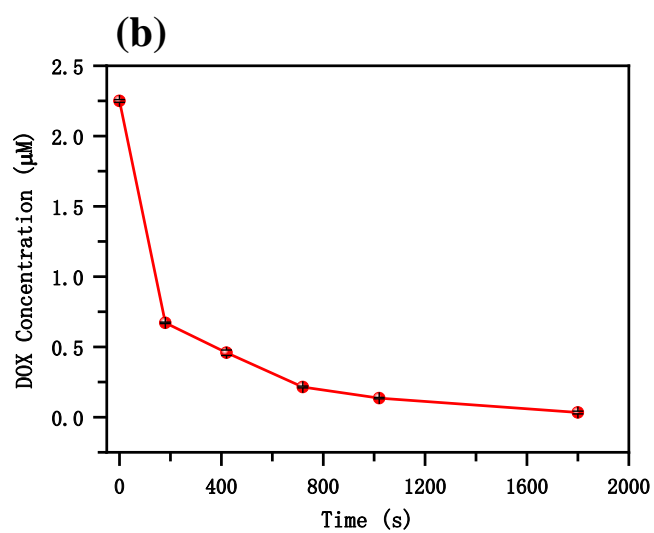

**Figure S3. Concentration of Fe(VI) (a) and DOX (b) with the reaction time**

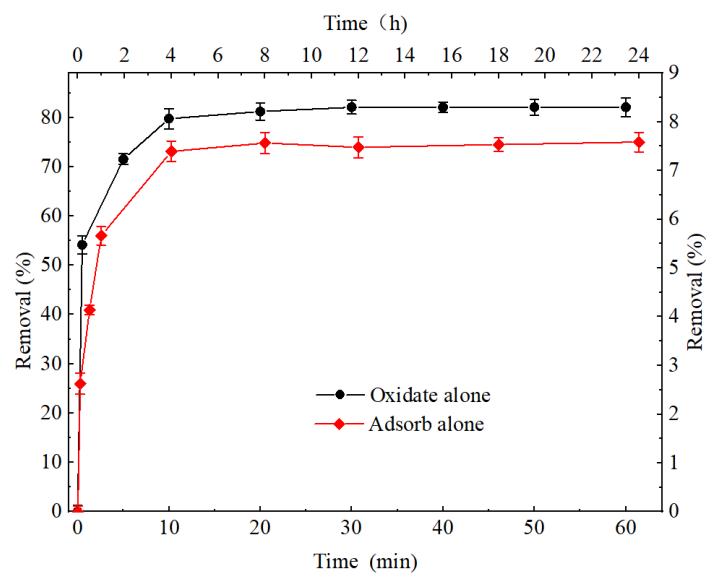

**Figure S4. Comparison of oxidation alone (left axis) and adsorption alone (right axis) on DOX removal**

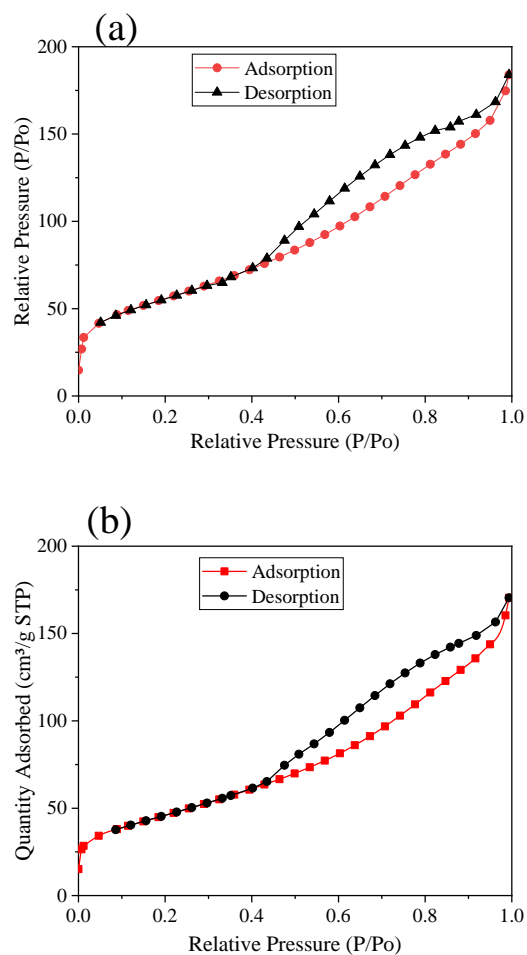

**Figure S5. Isotherm Linear Plot: Montmorillonite (a), Fe(III)+montmorillonite (b)**

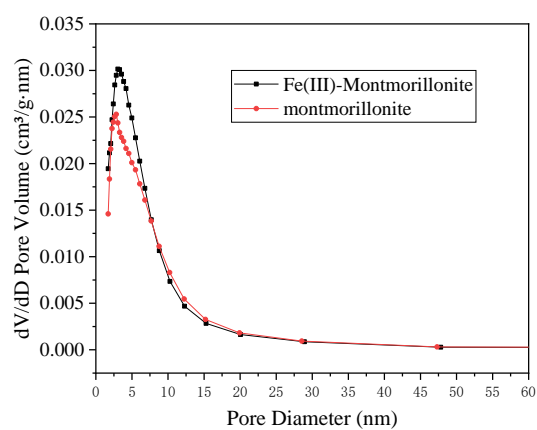

**Figure S6. BJH Adsorption dV/dD Pore Volume**

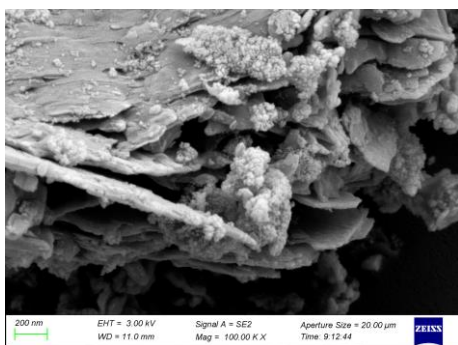

(a)

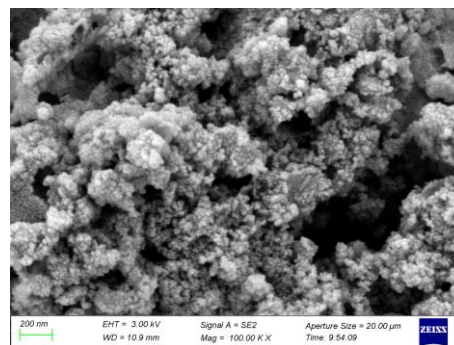

(b)

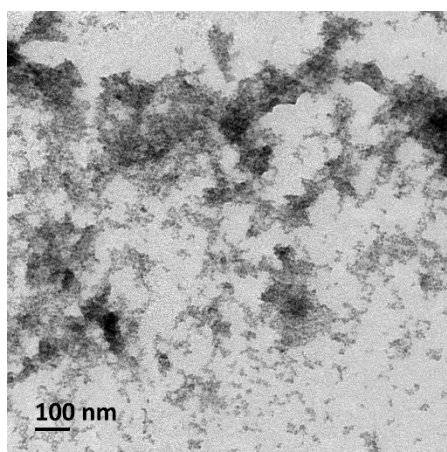

(c)

**Figure S7. (a) SEM-montmorillonite; (b) SEM-Fe(III) with montmorillonite; (c) TEM-Fe(III)-montmorillonite particles**

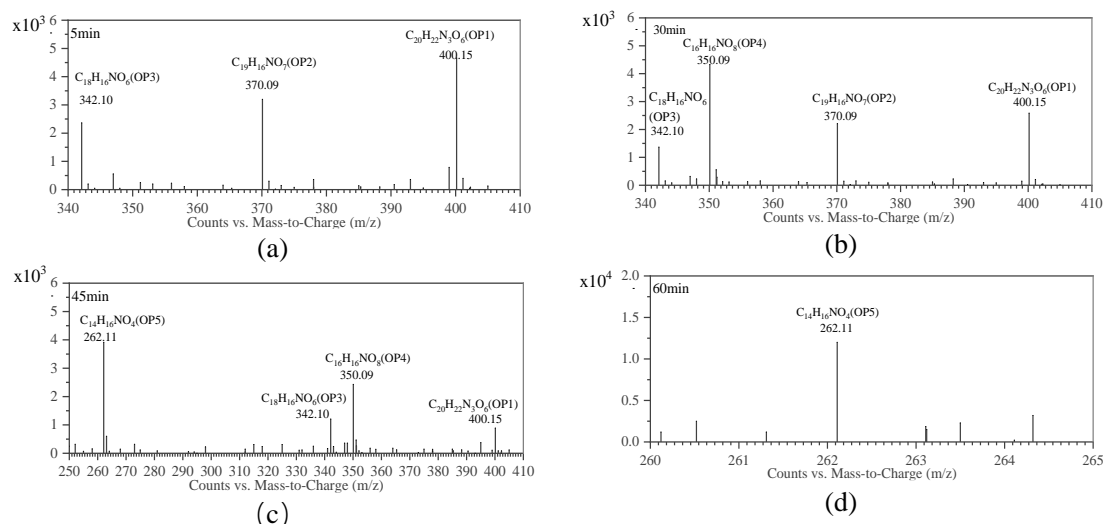

**Figure S8. GC-MS spectra of DOX degraded (a) 5 min intermediates; (b) 30 min intermediates; (c) 45min intermediates; (d) 60 min intermediates.**

**Table S1.** The UPLC and GC–MS conditions

| High-performance liquid chromatography<br>(HPLC) |                                                | Gas Chromatography-Mass Spectrometer<br>(GC–MS) |               |
|--------------------------------------------------|------------------------------------------------|-------------------------------------------------|---------------|
| Mobile phase                                     | A: 30% acetonitril<br>B: 70% 0.01M formic acid | Chromatographic<br>column                       | SE-54         |
| Flow rate                                        | 0.8 ml/min                                     | Carrier gas                                     | He (>99.999%) |
| Injection volume                                 | 20 µL                                          | Flow rate                                       | 0.7 mL/min    |
| Column<br>temperature                            | 30 °C                                          | Injection volume                                | 1 µL          |
| Detection<br>wavelength                          | 350 nm,                                        | Injection temperature                           | 280 °C        |
|                                                  |                                                | Source                                          | EI ion        |

**Table S2** Dissociation constants (*pKa*) of doxycycline

| <i>pK<sub>a</sub></i> [25]         | pH      | Doxycycline form[32] |
|------------------------------------|---------|----------------------|
| 3.02±0.3<br>7.97±0.15<br>9.15±0.30 | < 3.4   | DOX <sup>+</sup>     |
|                                    | 3.4-7.7 | DOX                  |
|                                    | 7.7-9.5 | DOX <sup>-</sup>     |
|                                    | > 9.5   | DOX <sup>-2</sup>    |



**Table S3. Detection products in DOX degradation by GC-MS**

| Molecular formula | Time (min) |   |   |       |       |       |    | Number |
|-------------------|------------|---|---|-------|-------|-------|----|--------|
|                   | 0          | 1 | 5 | 10    | 30    | 45    | 60 |        |
|                   | ✓          | ✓ | ✓ | trace | trace | ×     | ×  | DOX    |
|                   | ×          | ✓ | ✓ | ✓     | ✓     | trace | ×  | OP1    |
|                   | ×          | × | ✓ | ✓     | ✓     | ×     | ×  | OP2    |
|                   | ×          | × | ✓ | ✓     | ✓     | ✓     | ×  | OP3    |
|                   | ×          | × | × | ×     | ✓     | ✓     | ×  | OP4    |
|                   | ×          | × | × | ×     | ×     | ✓     | ✓  | OP-5   |

**Table S4. Textural attributes of adsorbents**

| Samples                 | BET Surface Area (m <sup>2</sup> /g) | Langmuir Surface Area (m <sup>2</sup> /g) | BJH Pore Volume (cm <sup>3</sup> /g) | BJH Pore Size (nm) |
|-------------------------|--------------------------------------|-------------------------------------------|--------------------------------------|--------------------|
| Fe(III)-montmorillonite | 195.37                               | 724.73                                    | 0.27                                 | 5.98               |
| Montmorillonite         | 159.33                               | 652.85                                    | 0.26                                 | 6.42               |
